# Supplementary material for: A Hormetic Spatiotemporal Photosystem II Response Mechanism of Salvia to Excess Zinc Exposure
Source: MDPI journal article supplement (doi:10.3390/ijms231911232), 2022-09-23
Supplement: s1 [file s1]

# A Hormetic Spatiotemporal Photosystem II Response

## Mechanism of Salvia to Excess Zinc Exposure

Michael Moustakas \*, Anelia Dobrikova, Ilektra Sperdouli, Anetta Hanć, Ioannis-Dimosthenis S. Adamakis, Julietta Moustaka and Emilia Apostolova

**Table S1.** Operating conditions for laser ablation inductively coupled plasma mass spectrometry (LA-ICP-MS) system

| Laser Ablation                   | Operating Conditions                              |
|----------------------------------|---------------------------------------------------|
| Instrument                       | CETAC LSX-500, Nd-YAG                             |
| Wavelength [nm]                  | 266                                               |
| Ablation frequency [Hz]          | 10                                                |
| Spot size [μm]                   | 100                                               |
| Laser energy [mJ]                | 5.4                                               |
| Scan rate [μm/s]                 | 80                                                |
| Distance between scan lines [μm] | 20                                                |
| Scan method                      | Mapping 2D; scanning                              |
| ICP-MS                           |                                                   |
| Instrument                       | PE Sciex ELAN 6100 DRC II                         |
| Nebulizer gas flow [L/min]       | 1.1                                               |
| Auxiliary gas flow [L/min]       | 1.2                                               |
| Plasma gas flow [L/min]          | 16                                                |
| RF Power [W]                     | 1350                                              |
| Lens setting                     | Autolens calibrated                               |
| Detector mode                    | Dual (pulse counting and analog mode)             |
| Measured mass to charge ratios   | Mg (m/z 26); Zn (m/z 66); Ca (m/z 43); C (m/z 13) |
| Sweeps                           | 1                                                 |

**Table S2.** The measured chlorophyll fluorescence parameters with their definitions

| Parameter     | Definition                                                                                                  | Calculation                                                                                                                                                                    |
|---------------|-------------------------------------------------------------------------------------------------------------|--------------------------------------------------------------------------------------------------------------------------------------------------------------------------------|
| $F_v/F_m$     | Maximum efficiency of PSII photochemistry                                                                   | $(F_m - F_o)/F_m$                                                                                                                                                              |
| $\Phi_{PSII}$ | Effective quantum yield of PSII photochemistry                                                              | $(F_m' - F_s)/F_m'$                                                                                                                                                            |
| $\Phi_{NPQ}$  | Quantum yield of regulated non-photochemical energy loss in PSII                                            | $F_s/F_m' - F_s/F_m$                                                                                                                                                           |
| $\Phi_{NO}$   | Quantum yield of nonregulated energy loss in PSII                                                           | $F_s/F_m$                                                                                                                                                                      |
| $F_v'/F_m'$   | Efficiency of open PSII centers                                                                             | $(F_m' - F_o')/F_m'$                                                                                                                                                           |
| $F_v/F_o$     | Efficiency of the oxygen evolving complex (OEC) on the donor side of PSII                                   | $(F_m - F_o)/F_o$                                                                                                                                                              |
| ETR           | Electron transport rate                                                                                     | $\Phi_{PSII} \times PAR \times c \times abs$ , where PAR is the photosynthetically active radiation, c is 0.5, and abs is the total light absorption of the leaf taken as 0.84 |
| qp            | Photochemical quenching, representing the fraction of PSII reaction centers in open state (puddle model)    | $(F_m' - F_s)/(F_m' - F_o')$                                                                                                                                                   |
| NPQ           | Non-photochemical quenching reflecting the dissipation of excitation energy as heat                         | $(F_m - F_m')/F_m'$                                                                                                                                                            |
| EXC           | Excess excitation energy                                                                                    | $(F_v/F_m - \Phi_{PSII})/F_v/F_m$                                                                                                                                              |
| 1-qL          | The fraction of PSII reaction centers in closed state (based on a “lake” model for the photosynthetic unit) | $qp \times F_o'/F_s$                                                                                                                                                           |

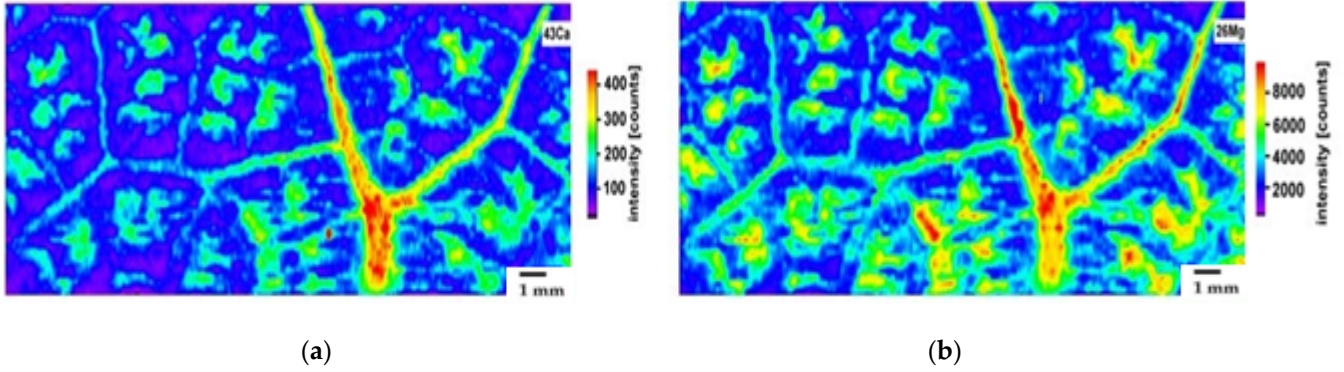

**Figure S1.** The distribution pattern of Ca (a) and Mg (b) in a control *Salvia sclarea* leaf segment.  $\text{Ca}^{43}$  and  $\text{Mg}^{26}$  intensities were normalized using  $\text{C}^{13}$ . Scale bar: 1 mm.

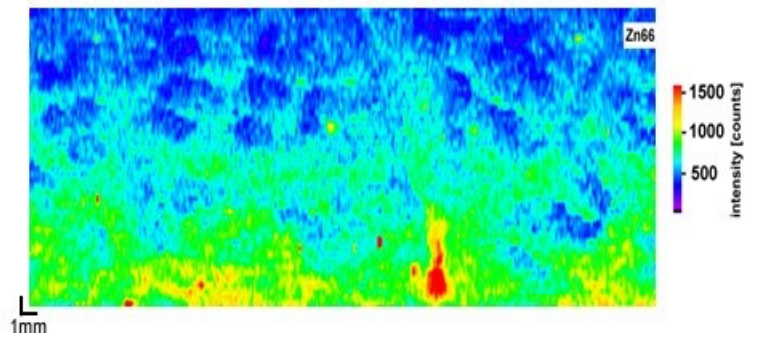

**Figure S2.** The distribution pattern of Zn in a control *Salvia sclarea* leaf segment.  $\text{Zn}^{66}$  intensities were normalized using  $\text{C}^{13}$ . Scale bar: 1 mm.

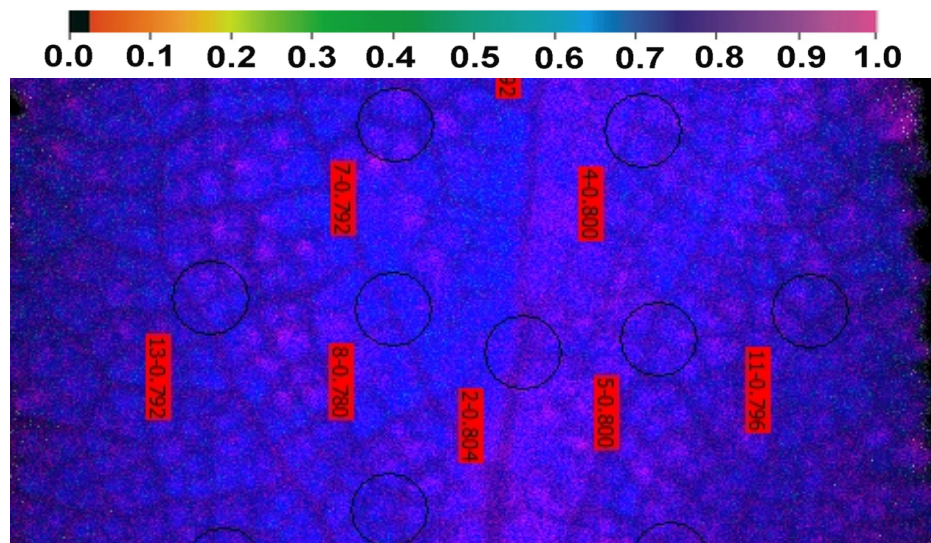

**Figure S3.** A color-coded leaf segment of a control *Salvia sclarea* plant showing the areas of interest (AOI) in circles together with red labels with the values of the fraction of open PSII reaction centers ( $q_p$ ) in the main leaf vein area and the intercostal fields.

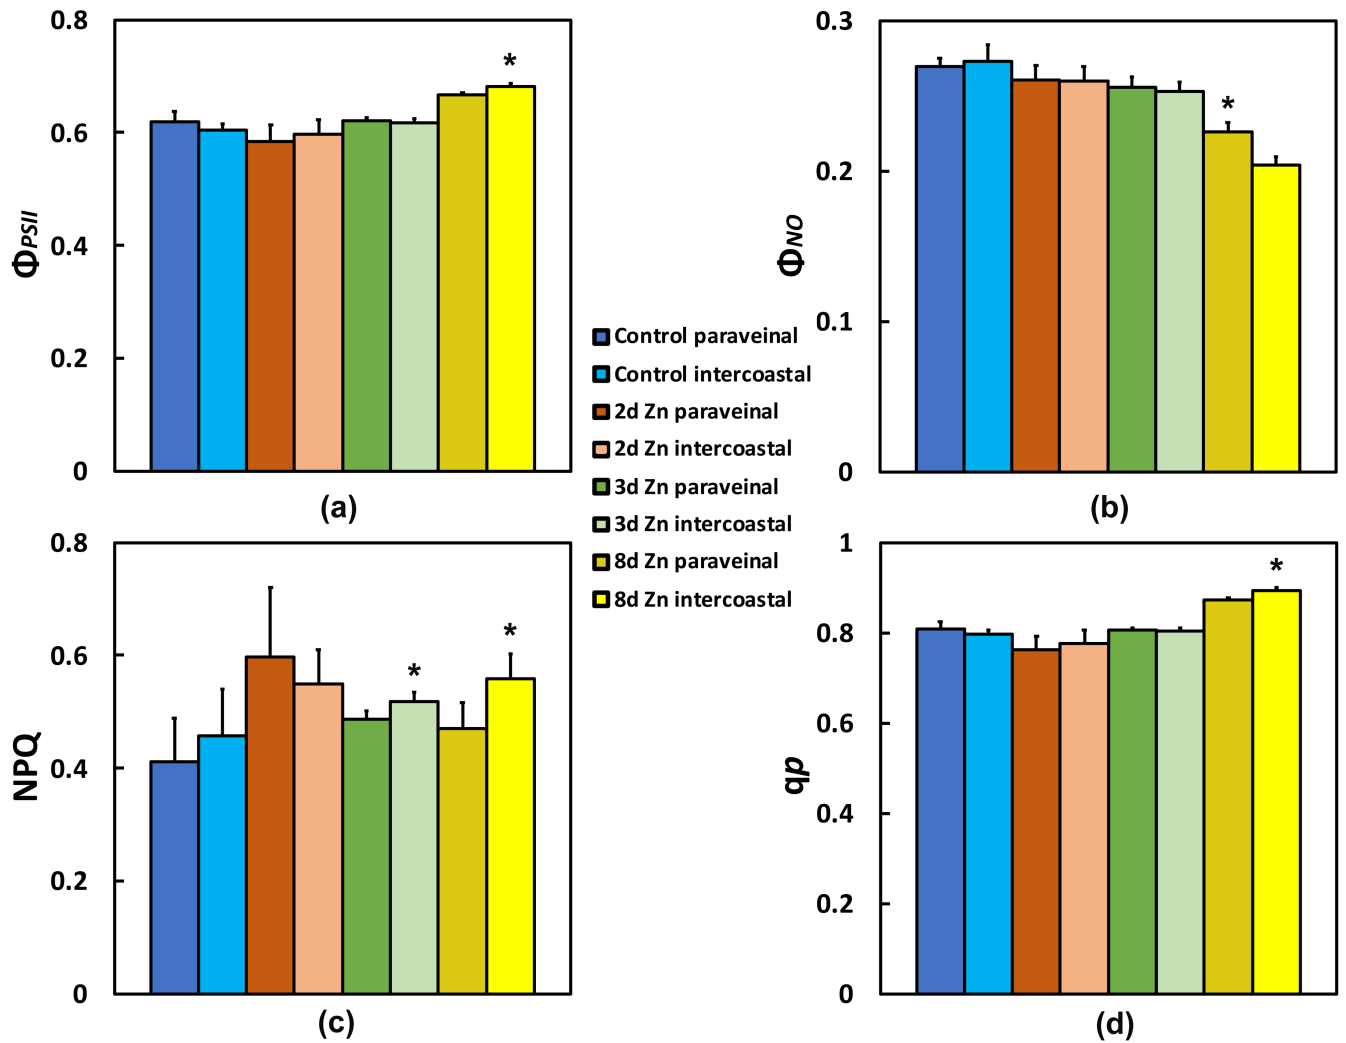

**Figure S4.** The effective quantum yield of PSII photochemistry ( $\Phi_{PSII}$ ) (a); the quantum yield of non-regulated energy dissipated in PSII ( $\Phi_{NO}$ ) (b); the non-photochemical quenching that reflects heat dissipation of excitation energy (NPQ) (c); and the fraction of open PSII reaction centers ( $qp$ ), a measure of the redox state of quinone A ( $Q_A$ ) (d), of the mid-vein-paraveinal areas of interest (AOI) and the intercostal field AOI, estimated at 220  $\mu\text{mol photons m}^{-2} \text{s}^{-1}$  actinic light (AL) intensity, after exposure of clary sage plants to 0 (Control), 2, 3, and 8-days 900  $\mu\text{M}$  Zn. An asterisk indicates significant difference at ( $p < 0.05$ ) between mid-vein areas and intercostal field for the same day treatment. For the statistically significant differences ( $p < 0.05$ ) a Welch's test for each independent variable between the mid vein paraveinal AOI and the intercostal AOI was conducted.

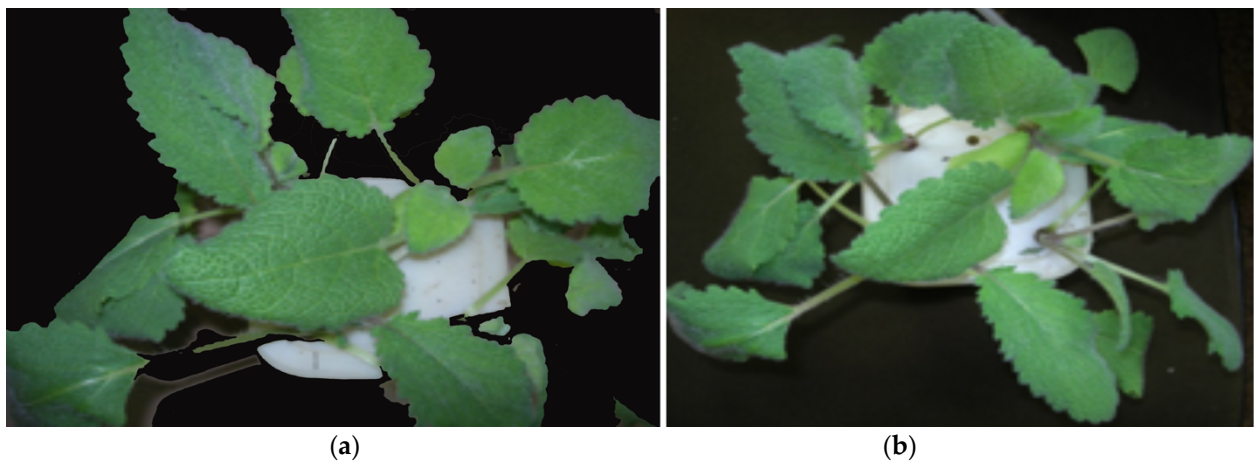

**Figure S5.** *Salvia sclarea* L. (clary sage) plants after 8 days in Hoagland nutrient solution with 5  $\mu\text{M}$  Zn, control (a) and after 8 days in Hoagland nutrient solution plus 900  $\mu\text{M}$  Zn (b).
